# Supplementary material for: Variations in the Corporate Social Responsibility-Performance Relationship in Emerging Market Firms
Source: Atypon-hosted journal article supplement (doi:10.1287/orsc.2022.1639), 2022-11-29
Supplement: orsc.2022.1639.sm1.pdf [file orsc.2022.1639.sm1.pdf]

**VARIATIONS IN THE CORPORATE SOCIAL RESPONSIBILITY-PERFORMANCE  
RELATIONSHIP IN EMERGING MARKET FIRMS**

**ONLINE APPENDIX**

Alvaro CUERVO-CAZURRA  
Northeastern University, D'Amore-McKim School of Business  
360 Huntington Avenue, 313 Hayden Hall, Boston, MA 02115-5000, USA  
Phone: +1-617-373-6568, email: a.cuervocazurra@neu.edu

Saptarshi PURKAYASTHA  
Strategic Management Academic Group  
Indian Institute of Management (IIM) Calcutta, India 700 104  
saptarshi@iimcal.ac.in

Kannan RAMASWAMY  
William D. Hacker Chair Professor of Management  
Thunderbird School of Global Management @ ASU, Phoenix, AZ 85004, USA  
kannan.ramaswamy@thunderbird.asu.edu

Table A1 Results of robustness tests of the impact of CSR dimension on performance and the role of business group affiliation using alternative dependent variables, independent variables, and endogeneity controls

|                                               | Alternate dependent variable  |                      | Alternate independent variable |                      | Endogeneity control:<br>Two-stage least square regression |                      |
|-----------------------------------------------|-------------------------------|----------------------|--------------------------------|----------------------|-----------------------------------------------------------|----------------------|
|                                               | Dependent variable: Tobin's q |                      | Dependent variable: ROA        |                      | Dependent variable: Industry ROA                          |                      |
|                                               | Model 1                       | Model 2              | Model 3                        | Model 4              | Model 5                                                   | Model 6              |
| Constant                                      | 3.779***<br>(0.715)           | 3.470***<br>(0.754)  | 23.090***<br>(3.007)           | 26.902***<br>(2.887) | 1.993<br>(2.818)                                          | 4.691<br>(2.959)     |
| Social CSR                                    | 0.156**<br>(0.071)            | 0.365***<br>(0.130)  | --                             | --                   | 0.084**<br>(0.033)                                        | 0.097***<br>(0.033)  |
| Social CSR Expenditure<br>(S-CSR Exp.)        | --                            | --                   | 1.125**<br>(0.526)             | 1.522***<br>(0.501)  | --                                                        | --                   |
| Governance CSR                                | 0.043**<br>(0.018)            | 0.037***<br>(0.012)  | --                             | --                   | 0.046*<br>(0.027)                                         | 0.016***<br>(0.006)  |
| Principal-Principal Conflict<br>(PP Conflict) | --                            | --                   | 0.156<br>(0.209)               | 0.912*<br>(0.505)    | --                                                        | --                   |
| Environmental CSR                             | -0.001<br>(0.001)             | -0.244*<br>(0.143)   | --                             | --                   | -0.025<br>(0.032)                                         | -0.248***<br>(0.060) |
| Environmental CSR Expenditure<br>(E-CSR Exp.) | --                            | --                   | -0.972***<br>(0.154)           | -0.629**<br>(0.276)  | --                                                        | --                   |
| Business Group (BG) Affiliation               | --                            | 0.178<br>(0.155)     | --                             | 2.835***<br>(0.701)  | --                                                        | 5.483***<br>(1.318)  |
| Social CSR* BG Affiliation                    | --                            | 0.457***<br>(0.151)  | --                             | --                   | --                                                        | 0.382***<br>(0.124)  |
| S-CSR Exp. * BG Affiliation                   | --                            | --                   | --                             | 2.320<br>(1.453)     | --                                                        | --                   |
| Governance CSR* BG Affiliation                | --                            | -0.357***<br>(0.131) | --                             | --                   | --                                                        | -4.192***<br>(1.547) |
| PP Conflict* BG Affiliation                   | --                            | --                   | --                             | -1.002*<br>(0.535)   | --                                                        | --                   |
| Environmental CSR* BG Affiliation             | --                            | -0.212<br>(0.157)    | --                             | --                   | --                                                        | -6.742***<br>(1.306) |
| E-CSR Exp.* BG Affiliation                    | --                            | --                   | --                             | -1.406***<br>(0.181) | --                                                        | --                   |
| Age                                           | -0.004***<br>(0.001)          | -0.007***<br>(0.002) | -0.032***<br>(0.007)           | -0.020***<br>(0.007) | -0.059***<br>(0.013)                                      | -0.050***<br>(0.014) |
| No. of employees                              | -0.013<br>(0.030)             | 0.008<br>(0.030)     | -0.450***<br>(0.172)           | -0.162<br>(0.127)    | 0.009<br>(0.246)                                          | 0.150<br>(0.254)     |
| Leverage                                      | -0.001***<br>(0.000)          | -0.001***<br>(0.000) | -0.006***<br>(0.002)           | -0.006***<br>(0.001) | -0.006***<br>(0.002)                                      | -0.007***<br>(0.002) |
| R&D intensity                                 | 0.050**<br>(0.022)            | 0.056***<br>(0.022)  | 1.024***<br>(0.126)            | 0.812***<br>(0.123)  | 0.540***<br>(0.117)                                       | 0.444***<br>(0.117)  |
| Marketing intensity                           | 0.011<br>(0.011)              | 0.009<br>(0.011)     | 0.012<br>(0.076)               | -0.001<br>(0.076)    | 0.017<br>(0.073)                                          | 0.016<br>(0.076)     |
| Investment Intensity                          | 0.024<br>(0.035)              | 0.012<br>(0.037)     | 0.403**<br>(0.167)             | 0.406**<br>(0.162)   | 0.704***<br>(0.266)                                       | 0.834***<br>(0.267)  |
| Total Diversification                         | 0.122<br>(0.081)              | 0.166**<br>(0.085)   | 0.599<br>(0.417)               | 0.760*<br>(0.401)    | -0.658<br>(0.795)                                         | 0.181<br>(0.814)     |
| Internationalization                          | 0.003<br>(0.002)              | 0.006**<br>(0.003)   | 0.008<br>(0.011)               | 0.029**<br>(0.013)   | 0.029**<br>(0.013)                                        | 0.011<br>(0.013)     |
| Strategic Ownership                           | 0.002<br>(0.002)              | 0.001<br>(0.002)     | 0.031***<br>(0.010)            | 0.019**<br>(0.009)   | 0.017<br>(0.014)                                          | 0.032**<br>(0.015)   |
| Institutional Ownership                       | -0.015***<br>(0.004)          | -0.013***<br>(0.004) | 0.000<br>(0.015)               | -0.011<br>(0.014)    | 0.010<br>(0.026)                                          | 0.004<br>(0.028)     |
| Media Attention                               | 0.013***<br>(0.003)           | 0.012***<br>(0.003)  | 0.059***<br>(0.015)            | 0.056***<br>(0.015)  | 0.168***<br>(0.028)                                       | 0.178***<br>(0.027)  |
| State Controls                                | Included                      | Included             | Included                       | Included             | Included                                                  | Included             |
| Industry Pollution type                       | Included                      | Included             | Included                       | Included             | Included                                                  | Included             |
| Industry Effects                              | Included                      | Included             | Included                       | Included             | --                                                        | --                   |
| Year Effects                                  | Included                      | Included             | Included                       | Included             | Included                                                  | Included             |
| Chi2 Square                                   | 4165.96***                    | 4204.66***           | 2855.53***                     | 3225.86***           | 397.42***                                                 | 404.77***            |
| Observations                                  | 919                           | 919                  | 919                            | 919                  | 919                                                       | 919                  |

Standard errors appear in parentheses. Significance levels: \*p<0.10\*\*p<0.05\*\*\*p<0.01

Table A2: Split sample panel regression results of the impact of CSR dimension on performance and the role of policy nudges

| Dependent variable: ROA    |                      |                      |                      |                      |                      |                      |                      |                      |
|----------------------------|----------------------|----------------------|----------------------|----------------------|----------------------|----------------------|----------------------|----------------------|
|                            | Model 1a             | Model 1b             | Model 2a             | Model 2b             | Model 3a             | Model 3b             | Model 4a             | Model 4b             |
|                            | After 2014           | Pre 2014             |
| Constant                   | 30.069***<br>(4.215) | 15.168***<br>(3.398) | 32.478***<br>(4.187) | 15.132***<br>(3.510) | 30.412***<br>(4.311) | 15.168***<br>(3.398) | 33.968***<br>(4.455) | 15.821***<br>(3.397) |
| Social CSR                 | 0.081**<br>(0.034)   | 0.051**<br>(0.022)   | --                   | --                   | --                   | --                   | 0.067**<br>(0.034)   | 0.038**<br>(0.019)   |
| Governance CSR             | --                   | --                   | 0.027***<br>(0.008)  | 0.012***<br>(0.003)  | --                   | --                   | 0.029***<br>(0.009)  | 0.025<br>(0.026)     |
| Environmental CSR          | --                   | --                   | --                   | --                   | -0.002<br>(0.009)    | -0.016***<br>(0.002) | -0.010<br>(0.010)    | -0.042***<br>(0.014) |
| Age                        | -0.026***<br>(0.009) | -0.027***<br>(0.008) | -0.028***<br>(0.010) | -0.022***<br>(0.006) | -0.026***<br>(0.009) | -0.027***<br>(0.008) | -0.028***<br>(0.010) | -0.028***<br>(0.008) |
| No. of employees           | -0.432<br>(0.265)    | -0.228<br>(0.198)    | -0.580**<br>(0.270)  | -0.020<br>(0.175)    | -0.483*<br>(0.272)   | -0.228<br>(0.198)    | -0.691**<br>(0.293)  | -0.296<br>(0.203)    |
| Leverage                   | -0.006***<br>(0.001) | -0.005**<br>(0.002)  | -0.006***<br>(0.001) | -0.005**<br>(0.002)  | -0.006***<br>(0.001) | -0.005**<br>(0.002)  | -0.006***<br>(0.001) | -0.004*<br>(0.002)   |
| R&D intensity              | 0.923***<br>(0.173)  | 0.981***<br>(0.191)  | 0.840***<br>(0.174)  | 0.952***<br>(0.181)  | 0.937***<br>(0.175)  | 0.981***<br>(0.191)  | 0.865***<br>(0.175)  | 1.063***<br>(0.199)  |
| Marketing intensity        | 0.298**<br>(0.116)   | 0.123*<br>(0.071)    | 0.233*<br>(0.119)    | 0.117*<br>(0.071)    | 0.312***<br>(0.115)  | 0.123*<br>(0.071)    | 0.238**<br>(0.119)   | 0.113<br>(0.070)     |
| Investment Intensity       | 0.966**<br>(0.487)   | 0.726<br>(0.548)     | 1.019**<br>(0.456)   | 1.018*<br>(0.589)    | 1.051**<br>(0.499)   | 0.726<br>(0.548)     | 0.917*<br>(0.469)    | 0.780<br>(0.543)     |
| Total Diversification      | 1.079<br>(0.668)     | 1.287**<br>(0.554)   | 1.206*<br>(0.717)    | 0.896**<br>(0.438)   | 1.147*<br>(0.675)    | 1.287**<br>(0.554)   | 1.177<br>(0.717)     | 1.583***<br>(0.560)  |
| Internationalization       | 0.079***<br>(0.011)  | 0.052***<br>(0.015)  | 0.067***<br>(0.013)  | 0.048***<br>(0.016)  | 0.078***<br>(0.011)  | 0.052***<br>(0.015)  | 0.068***<br>(0.013)  | 0.049***<br>(0.015)  |
| Strategic Ownership        | 0.008<br>(0.013)     | 0.031***<br>(0.010)  | -0.003<br>(0.015)    | 0.019**<br>(0.008)   | 0.009<br>(0.013)     | 0.031***<br>(0.010)  | -0.006<br>(0.015)    | 0.033***<br>(0.010)  |
| Institutional Ownership    | -0.009<br>(0.023)    | 0.019<br>(0.018)     | -0.010<br>(0.021)    | 0.002<br>(0.012)     | -0.008<br>(0.025)    | 0.019<br>(0.018)     | -0.020<br>(0.024)    | 0.011<br>(0.018)     |
| Media Attention            | 0.003<br>(0.019)     | 0.041**<br>(0.019)   | 0.009<br>(0.020)     | 0.010<br>(0.011)     | 0.005<br>(0.019)     | 0.041**<br>(0.019)   | 0.010<br>(0.020)     | 0.033***<br>(0.012)  |
| State Controls             | Included             |
| Industry Pollution type    | Included             |
| Industry Effect            | Included             |
| Year Effect                | Included             |
| Chi <sup>2</sup> Statistic | 3171.43***           | 2246.42***           | 3033.07***           | 2736.16***           | 3212.60***           | 2238.83***           | 3036.01***           | 2275.39***           |
| Observations               | 326                  | 555                  | 326                  | 555                  | 326                  | 555                  | 326                  | 555                  |

Standard errors appear in parentheses. Significance levels: \*p<0.10\*\*p<0.05\*\*\*p<0.01

Table A3: Results of split sample robustness tests of the impact of CSR dimension on performance and the role of policy nudges using alternative dependent variables, independent variables, and endogeneity controls

|                               | Alternate dependent variable  |                         | Alternate independent variable |                         | Endogeneity control: Two stage least square regression |                         |
|-------------------------------|-------------------------------|-------------------------|--------------------------------|-------------------------|--------------------------------------------------------|-------------------------|
|                               | Dependent variable: Tobin's q |                         | Dependent variable: ROA        |                         | Dependent variable: Industry ROA                       |                         |
|                               | Model 1a<br>After 2014        | Model 1b<br>Before 2014 | Model 2a<br>After 2014         | Model 2b<br>Before 2014 | Model 3a<br>After 2014                                 | Model 3b<br>Before 2014 |
| Constant                      | 7.642***<br>(0.952)           | 4.404***<br>(0.474)     | 30.639***<br>(4.232)           | 17.013***<br>(3.445)    | 6.838<br>(4.460)                                       | 1.713<br>(5.019)        |
| Social CSR                    | 0.132***<br>(0.039)           | 0.065***<br>(0.007)     | --                             | --                      | 0.086**<br>(0.040)                                     | 0.019***<br>(0.006)     |
| Social CSR Expenditure        | --                            | --                      | 1.121***<br>(0.377)            | 0.658**<br>(0.316)      | --                                                     | --                      |
| Governance CSR                | 0.059***<br>(0.019)           | 0.023***<br>(0.008)     | --                             | --                      | -0.033<br>(0.033)                                      | 0.039<br>(0.066)        |
| Principal-Principal Conflict  | --                            | --                      | 0.652***<br>(0.252)            | 0.238***<br>(0.049)     | --                                                     | --                      |
| Environmental CSR             | -0.037**<br>(0.016)           | -0.041***<br>(0.004)    | --                             | --                      | -0.032<br>(0.040)                                      | -0.023**<br>(0.012)     |
| Environmental CSR Expenditure | --                            | --                      | -0.332**<br>(0.152)            | -1.431***<br>(0.206)    | --                                                     | --                      |
| Age                           | -0.005***<br>(0.002)          | -0.004***<br>(0.001)    | -0.023**<br>(0.009)            | -0.024***<br>(0.007)    | -0.048**<br>(0.019)                                    | 0.001<br>(0.034)        |
| No. of employees              | -0.063**<br>(0.030)           | -0.026<br>(0.031)       | 0.313<br>(0.256)               | -0.256<br>(0.191)       | -0.283<br>(0.413)                                      | 0.308<br>(0.480)        |
| Leverage                      | -0.001***<br>(0.000)          | -0.001***<br>(0.000)    | -0.007***<br>(0.001)           | -0.005**<br>(0.002)     | -0.001<br>(0.002)                                      | -0.016***<br>(0.003)    |
| R&D intensity                 | 0.087***<br>(0.016)           | 0.035<br>(0.029)        | 0.921***<br>(0.172)            | 1.074***<br>(0.192)     | 0.602***<br>(0.141)                                    | 1.412***<br>(0.219)     |
| Marketing intensity           | 0.089***<br>(0.023)           | 0.025**<br>(0.010)      | 0.262**<br>(0.116)             | 0.092<br>(0.067)        | 0.283**<br>(0.142)                                     | 0.150<br>(0.100)        |
| Investment Intensity          | 0.074<br>(0.057)              | 0.241***<br>(0.075)     | 0.641<br>(0.485)               | 0.390<br>(0.562)        | 1.457***<br>(0.509)                                    | 0.661<br>(0.897)        |
| Total Diversification         | 0.195*<br>(0.115)             | 0.019<br>(0.091)        | 0.585<br>(0.677)               | 1.101*<br>(0.563)       | -0.777<br>(1.038)                                      | 0.100<br>(1.484)        |
| Internationalization          | 0.013***<br>(0.004)           | 0.001<br>(0.003)        | 0.065***<br>(0.012)            | 0.072***<br>(0.013)     | 0.006<br>(0.017)                                       | 0.100***<br>(0.029)     |
| Strategic Ownership           | 0.001<br>(0.003)              | 0.001<br>(0.002)        | 0.014<br>(0.010)               | 0.031***<br>(0.009)     | -0.011<br>(0.024)                                      | 0.015<br>(0.020)        |
| Institutional Ownership       | -0.017***<br>(0.004)          | -0.002<br>(0.003)       | -0.023<br>(0.024)              | 0.010<br>(0.017)        | 0.038<br>(0.045)                                       | 0.030<br>(0.042)        |
| Media Attention               | -0.000<br>(0.003)             | 0.010***<br>(0.003)     | 0.007<br>(0.018)               | 0.035*<br>(0.018)       | 0.111***<br>(0.036)                                    | 0.079*<br>(0.041)       |
| State Controls                | Included                      | Included                | Included                       | Included                | Included                                               | Included                |
| Industry Pollution type       | Included                      | Included                | Included                       | Included                | Included                                               | Included                |
| Industry Effect               | Included                      | Included                | Included                       | Included                | --                                                     | --                      |
| Year Effect                   | Included                      | Included                | Included                       | Included                | Included                                               | Included                |
| Chi <sup>2</sup> Statistics   | 3715.89***                    | 1582.93***              | 3667.06***                     | 2418.32***              | 233.22***                                              | 110.62***               |
| Observations                  | 326                           | 555                     | 326                            | 555                     | 326                                                    | 555                     |

Standard errors appear in parentheses. Significance levels: \*p<0.10\*\*p<0.05\*\*\*p<0.01

Table A4: Panel regression analyses of ESG metrics on ROA in US and German firms and comparison to Indian firms<sup>1</sup>.

|                             | USA<br>Model 1       | Germany<br>Model 2   | Malaysia<br>Model 3  | Taiwan<br>Model 4    |
|-----------------------------|----------------------|----------------------|----------------------|----------------------|
| Constant                    | 6.597*<br>(3.474)    | 9.439***<br>(0.956)  | 2.858***<br>(0.260)  | 11.301***<br>(1.138) |
| Social CSR                  | -0.080***<br>(0.014) | -0.038***<br>(0.014) | 0.075***<br>(0.024)  | 0.112***<br>(0.012)  |
| Governance CSR              | 0.021**<br>(0.009)   | 0.007<br>(0.008)     | 0.043**<br>(0.021)   | 0.056***<br>(0.018)  |
| Environmental CSR           | 0.048***<br>(0.012)  | 0.065***<br>(0.009)  | -0.046**<br>(0.022)  | -0.019***<br>(0.007) |
| Age                         | 0.008<br>(0.006)     | 0.002<br>(0.003)     | -0.093***<br>(0.024) | -0.026***<br>(0.004) |
| Number of employees         | 0.317**<br>(0.124)   | 0.467***<br>(0.065)  | -0.257***<br>(0.093) | -0.813***<br>(0.091) |
| Leverage                    | -0.054***<br>(0.008) | -0.049***<br>(0.005) | -0.102***<br>(0.021) | -0.113***<br>(0.009) |
| R&D intensity               | 0.001*<br>(0.001)    | 0.008***<br>(0.000)  | 0.141<br>(0.492)     | 0.026***<br>(0.005)  |
| Marketing intensity         | 0.000<br>(0.000)     | 0.008***<br>(0.000)  | 0.174***<br>(0.053)  | 0.024***<br>(0.004)  |
| Investment Intensity        | 0.924***<br>(0.269)  | 0.318***<br>(0.055)  | 3.767**<br>(1.824)   | 0.789***<br>(0.100)  |
| Diversification             | -0.074<br>(0.509)    | -0.322<br>(0.280)    | 4.420***<br>(0.602)  | 1.025***<br>(0.237)  |
| Internationalization        | 0.005<br>(0.007)     | 0.007***<br>(0.001)  | 0.011***<br>(0.003)  | 0.008***<br>(0.001)  |
| Strategic Ownership         | 0.008<br>(0.014)     | 0.040***<br>(0.005)  | 0.005<br>(0.014)     | 0.121***<br>(0.008)  |
| Institutional ownership     | 0.019***<br>(0.005)  | -0.001<br>(0.007)    | -0.004<br>(0.018)    | 0.143***<br>(0.011)  |
| Media attention             | 0.116***<br>(0.027)  | 0.071***<br>(0.013)  | 0.045<br>(0.036)     | 0.100***<br>(0.017)  |
| Industry Effects            | Included             | Included             | Included             | Included             |
| Year Effects                | Included             | Included             | Included             | Included             |
| Chi <sup>2</sup> Statistics | 3045.71***           | 3368.87***           | 1392.03***           | 6134.07***           |
| Observations                | 24878                | 2029                 | 659                  | 1481                 |

Standard errors in parentheses. \*  $p < 0.10$ , \*\*  $p < 0.05$ , \*\*\*  $p < 0.01$

<sup>1</sup> These results are a part of a working paper analyzing CSR in developed and emerging markets.
